# Supplementary material
Source: Springer Nature journal article supplement (https://www.springermedizin.de/resource/supplementary/13098_2010_128_MOESM1_ESM.pdf/9670576)

# HbA1c (%)

p=0.05

8.6 ± 2.0

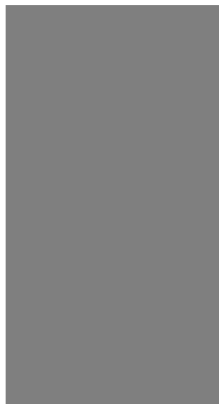

Depression

7.5 ± 1.8

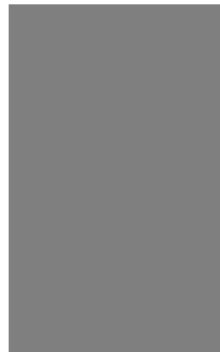

w/out Depression

Supplement: MOESM1 [file 9670576]
